# Supplementary material
Source: PubMed Central journal article supplement (PMC8864551)
Supplement: NIHMS1776644-supplement-Sup_Fig__1.pdf [file NIHMS1776644-supplement-Sup_Fig__1.pdf]

Fig. 1

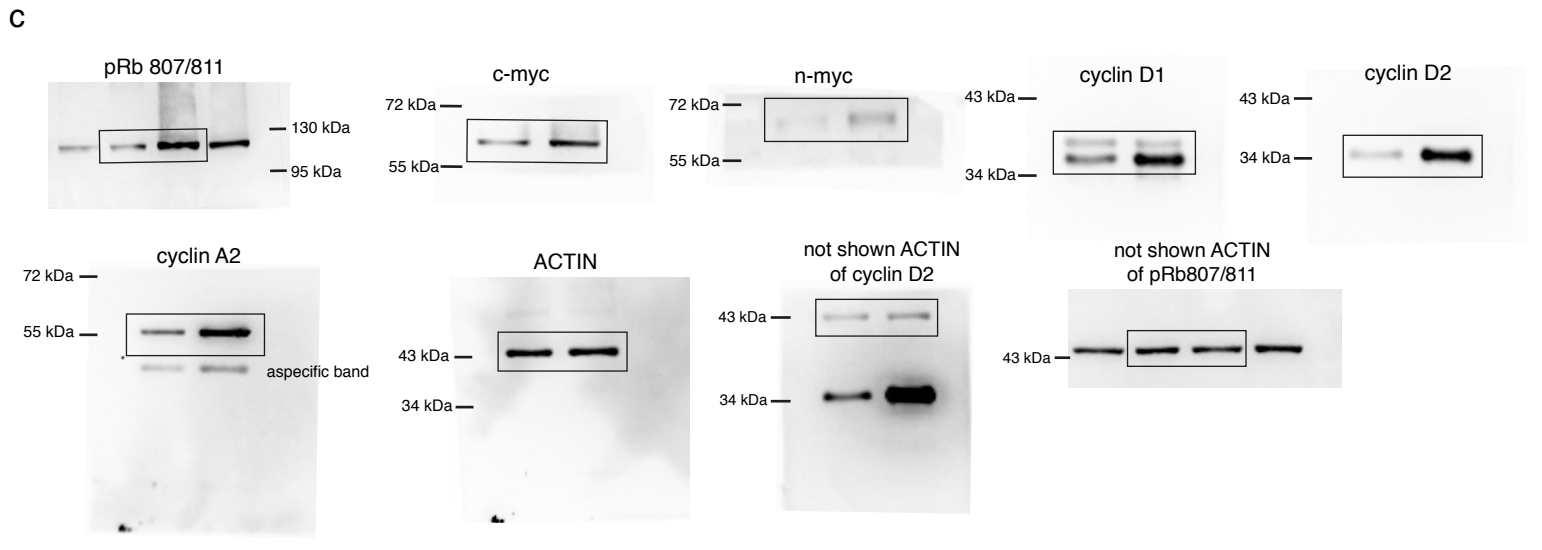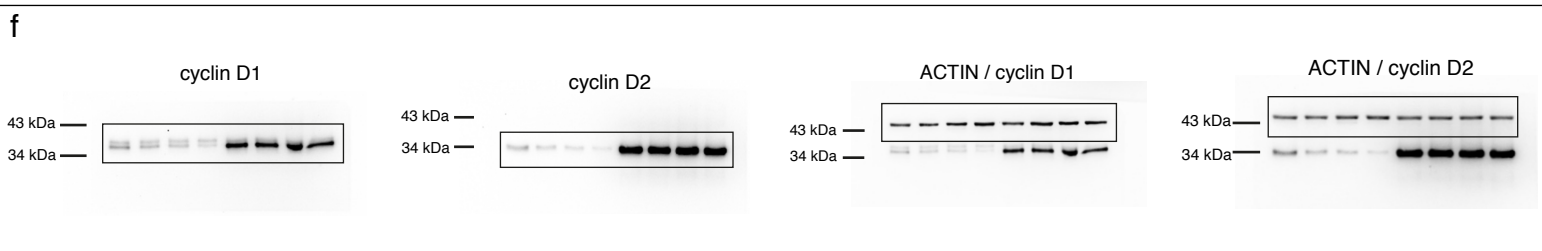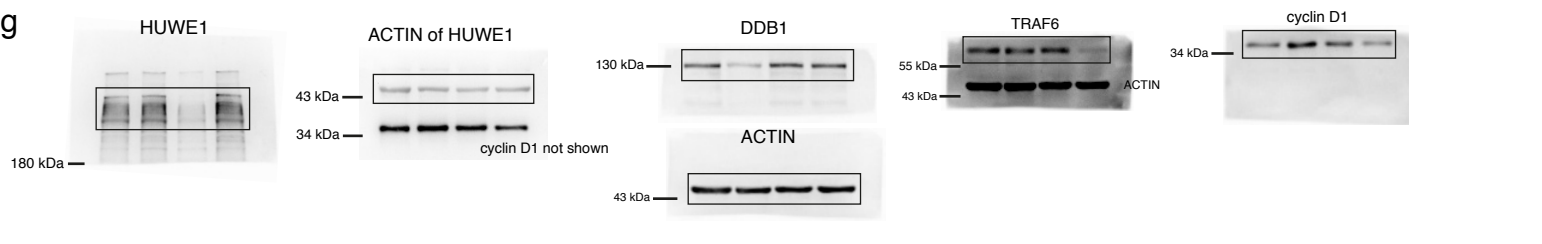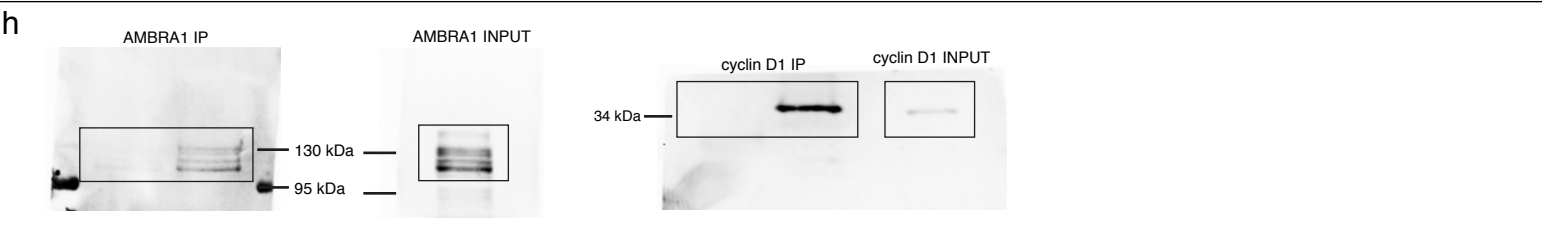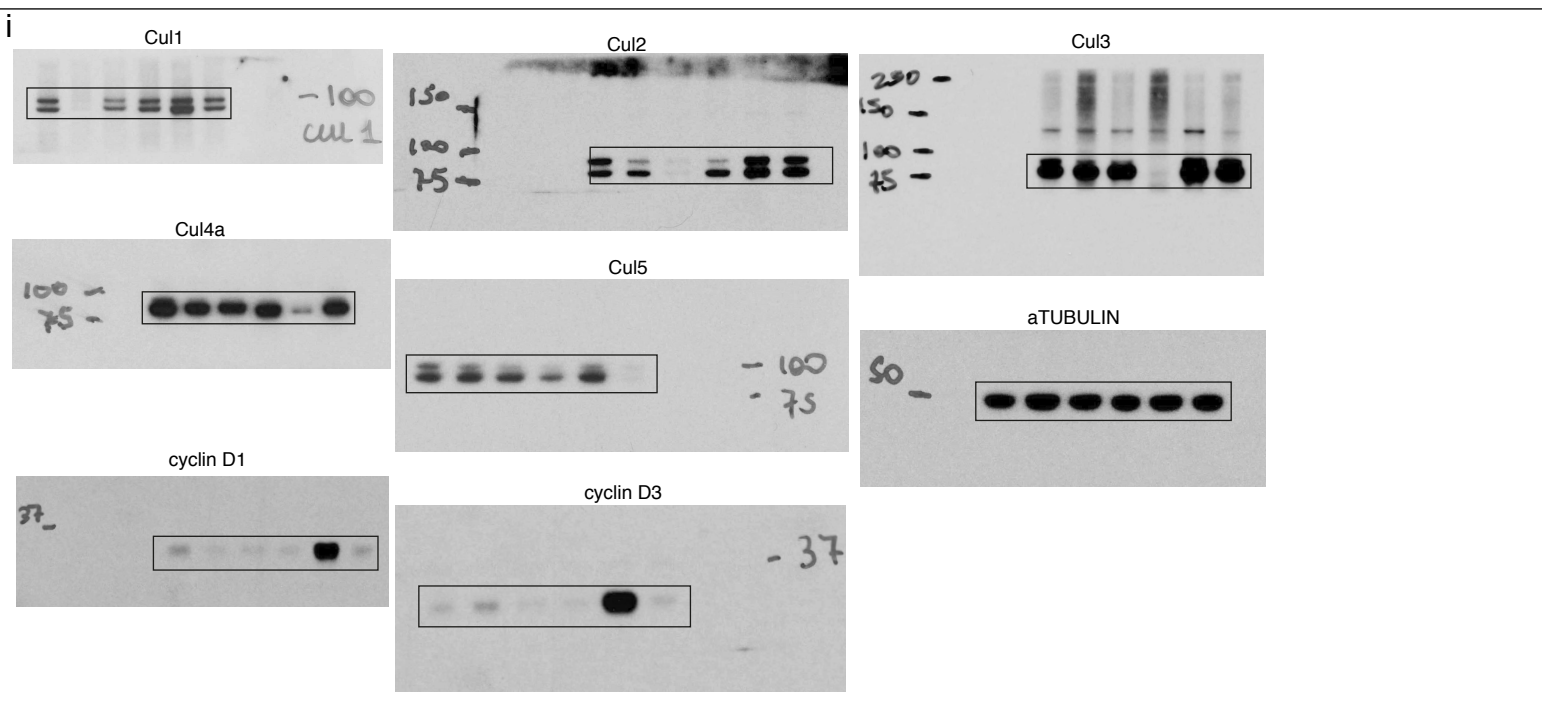

Fig. 2

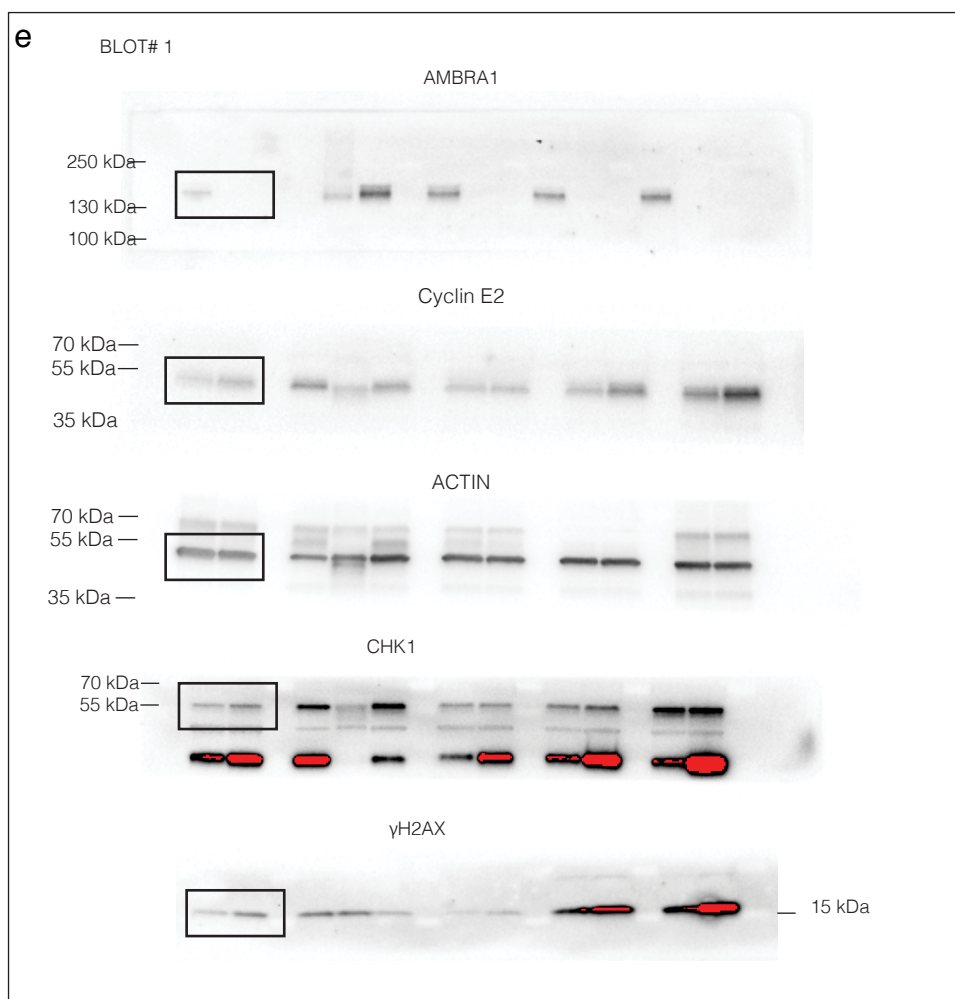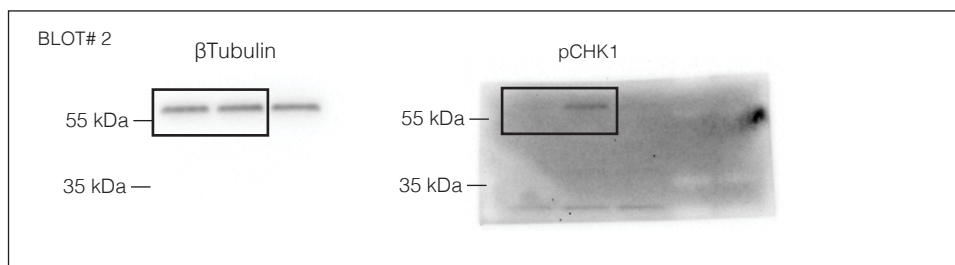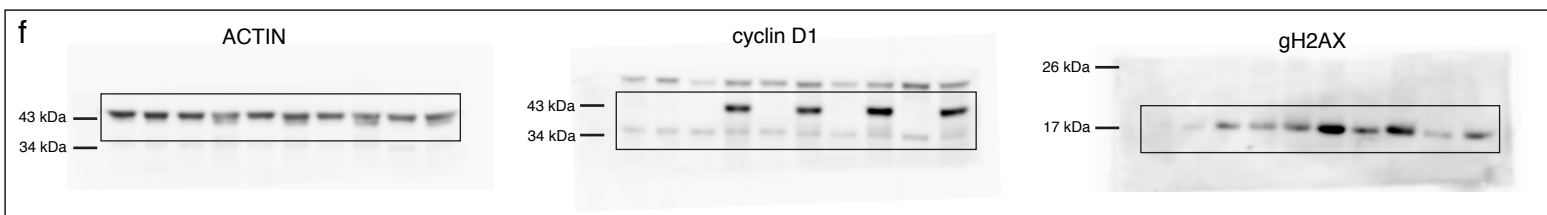

ED Fig. 1

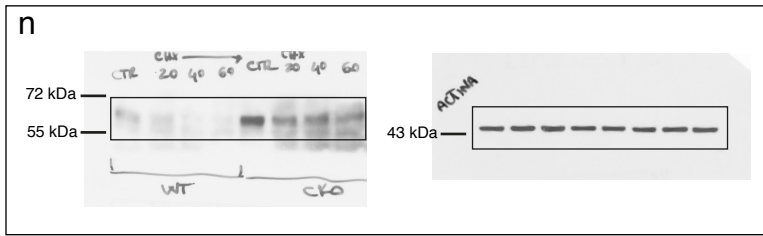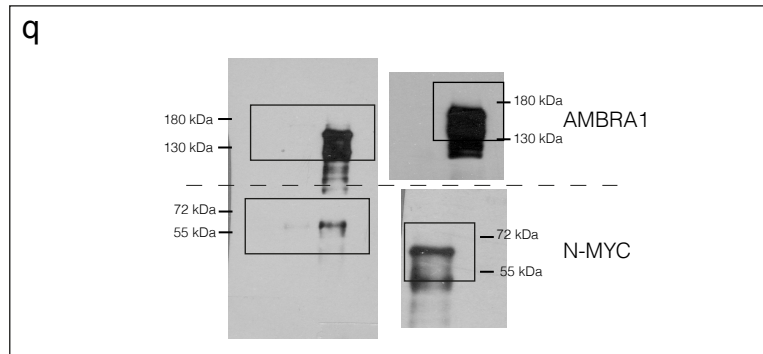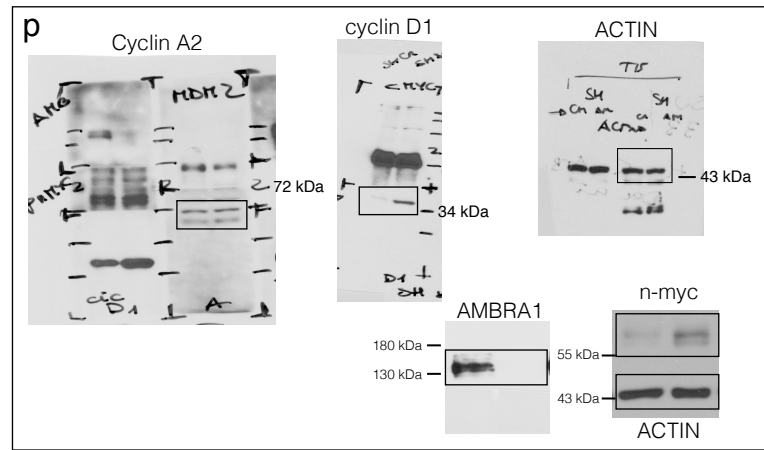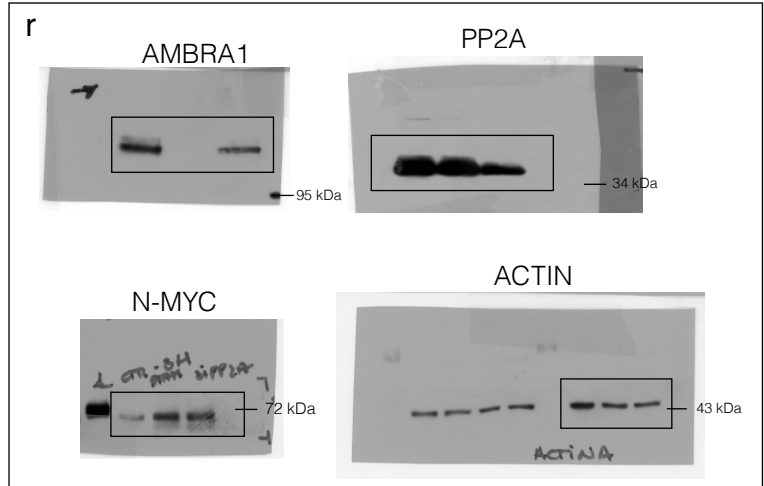

ED Fig. 2

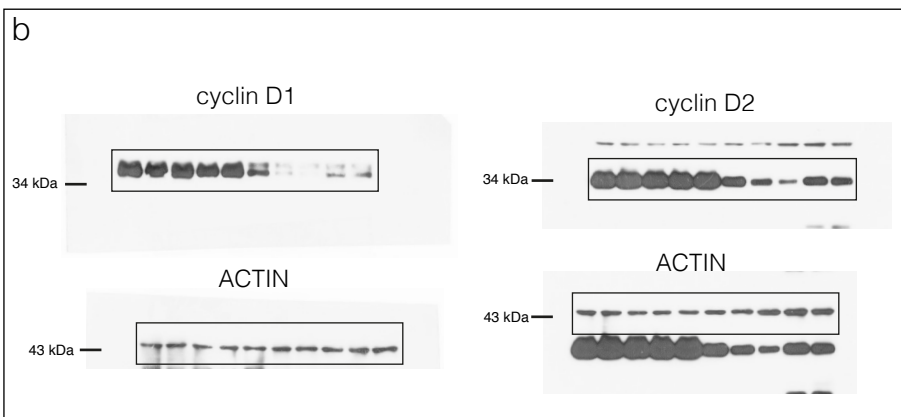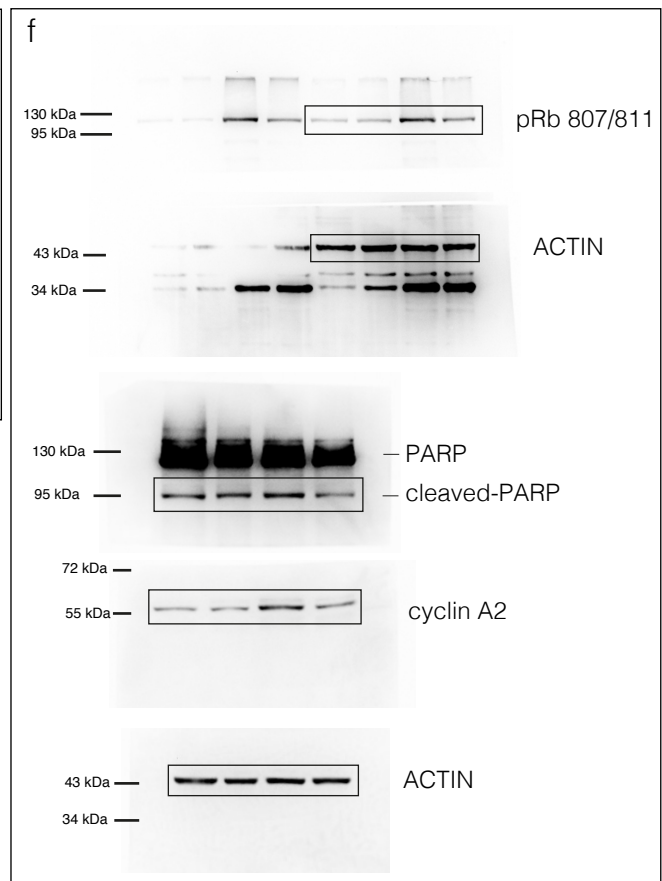

ED Fig. 3

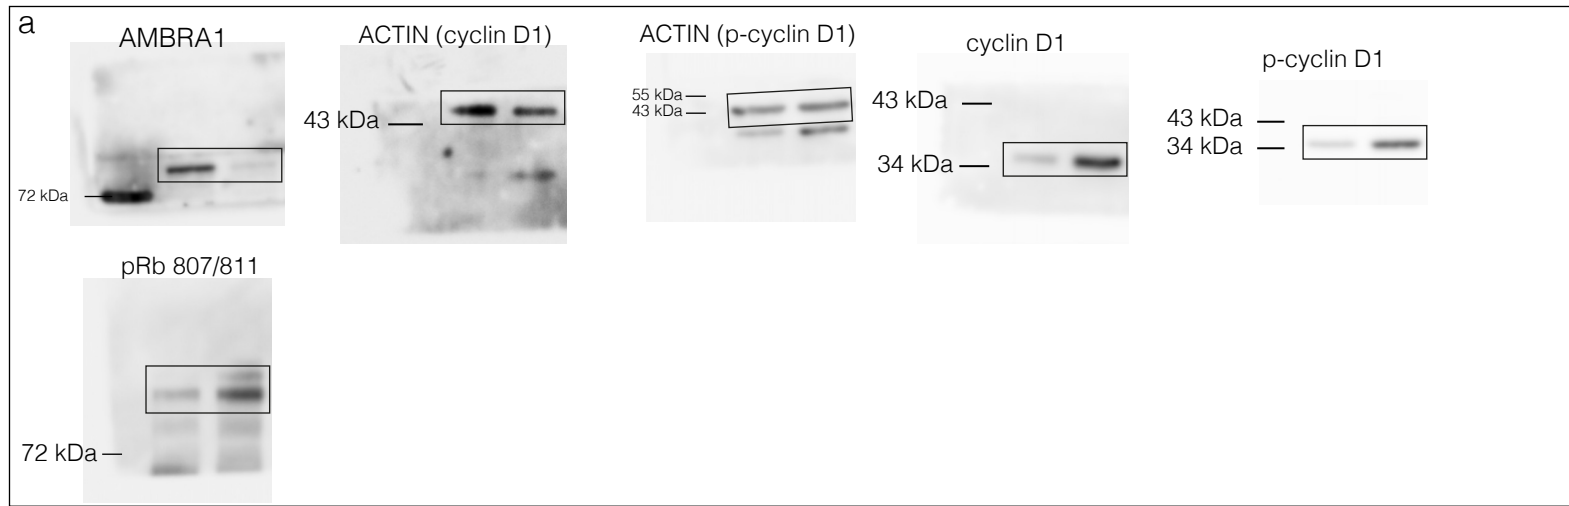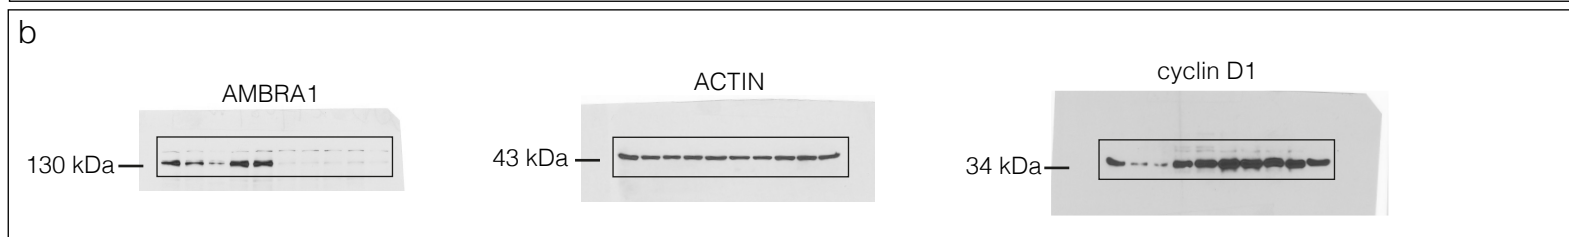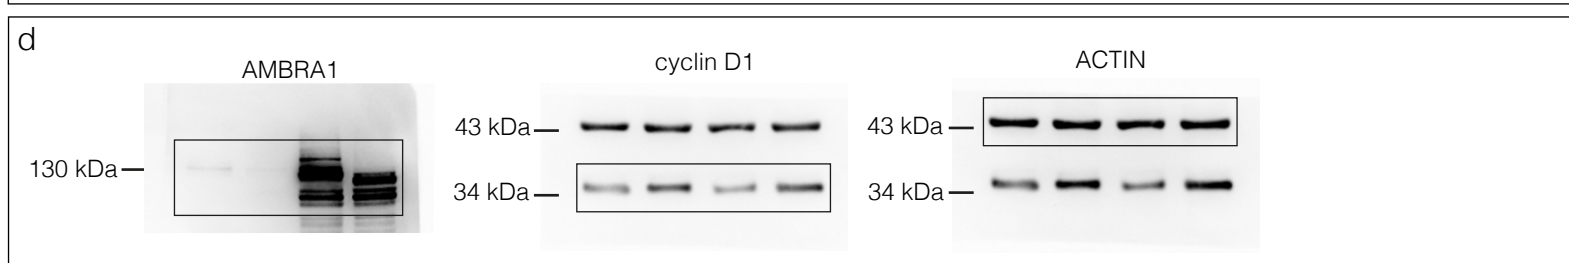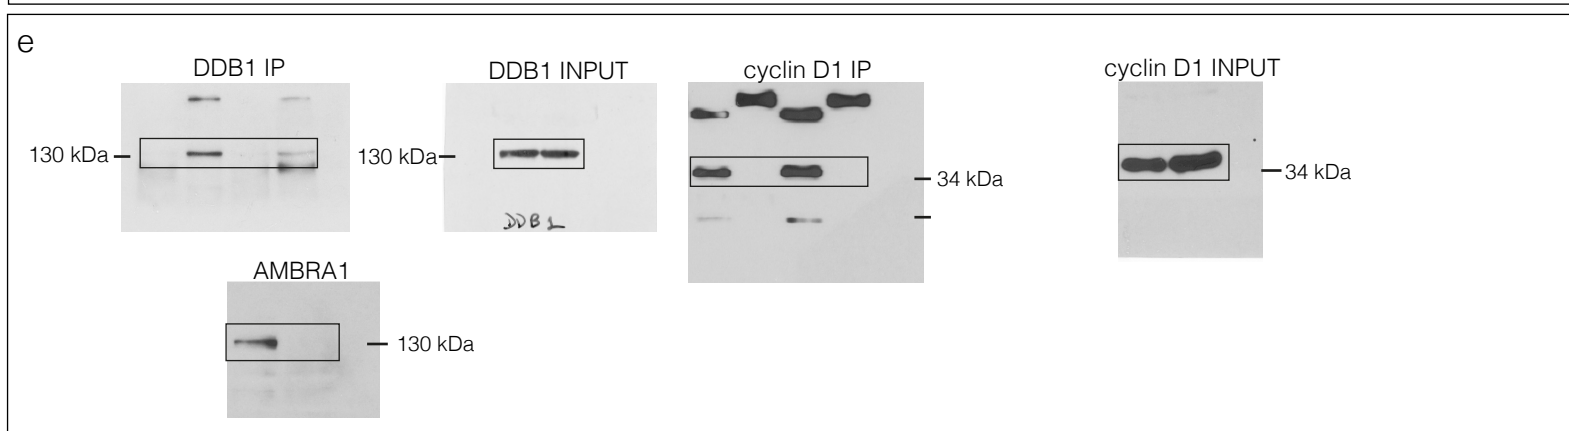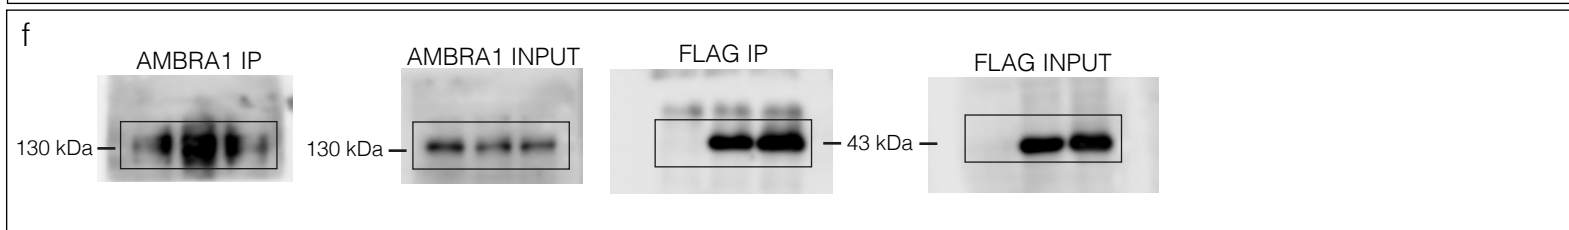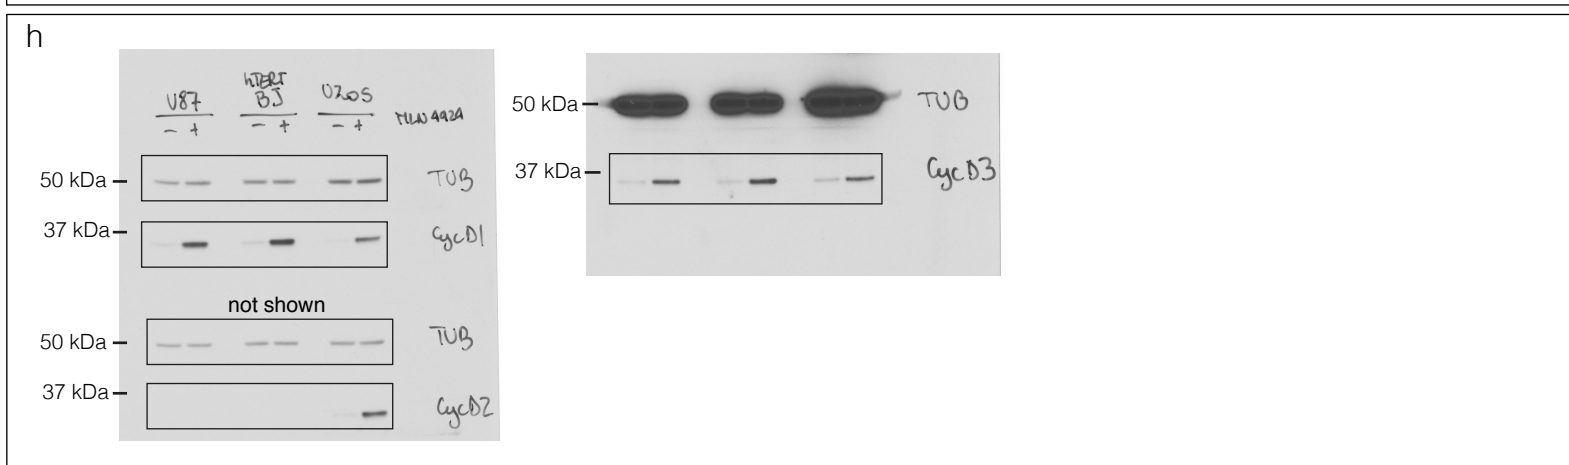



# ED Fig. 3

Ext Data Fig 3 k

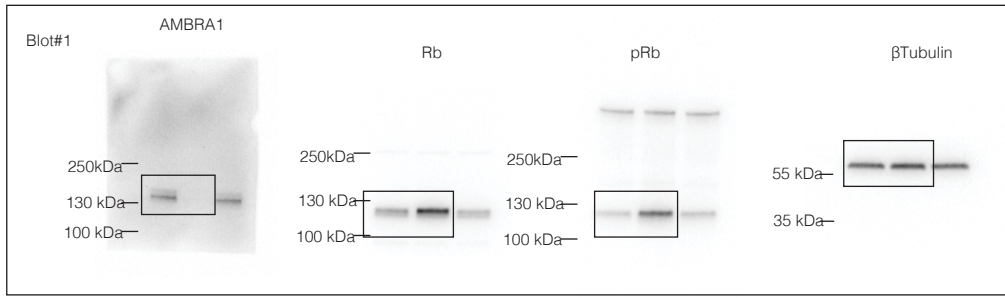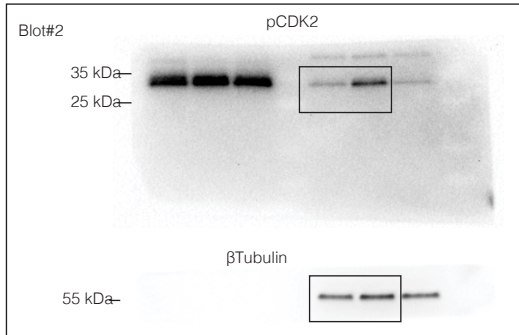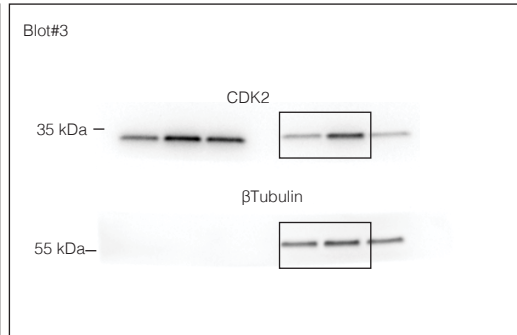

Ext Data Fig 3 l

Blot#1

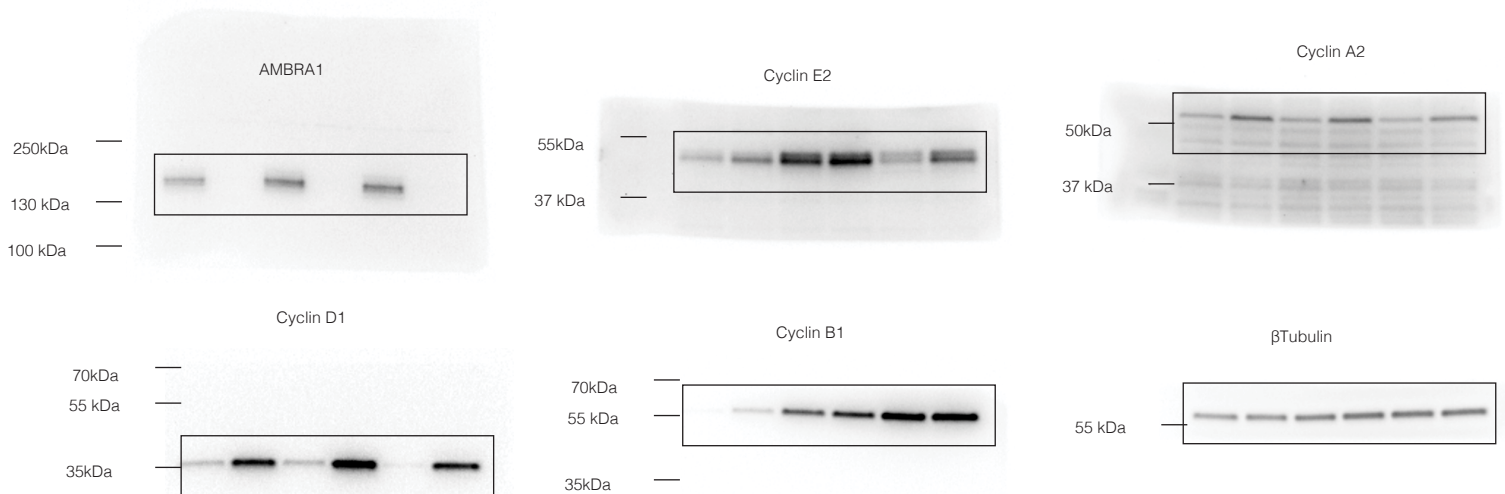

Blot#2

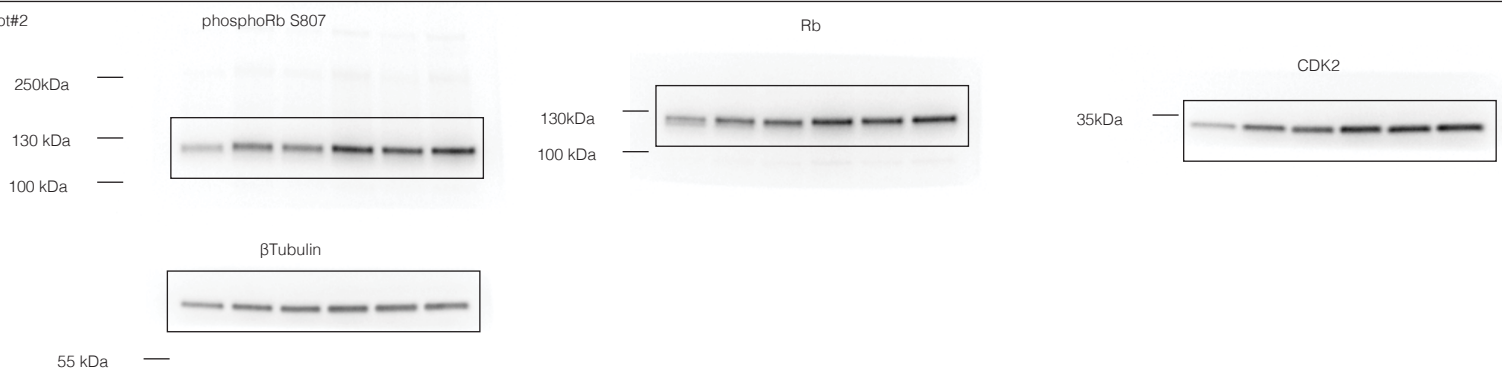

Blot#3

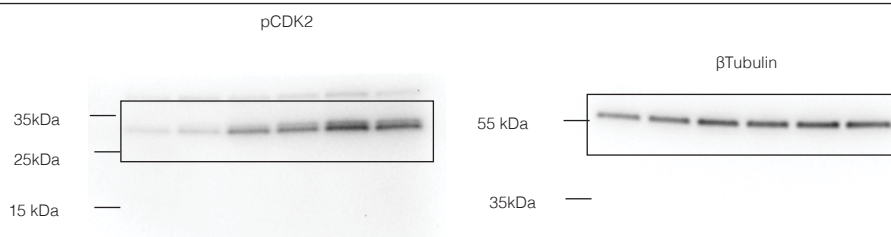

ED Fig. 3

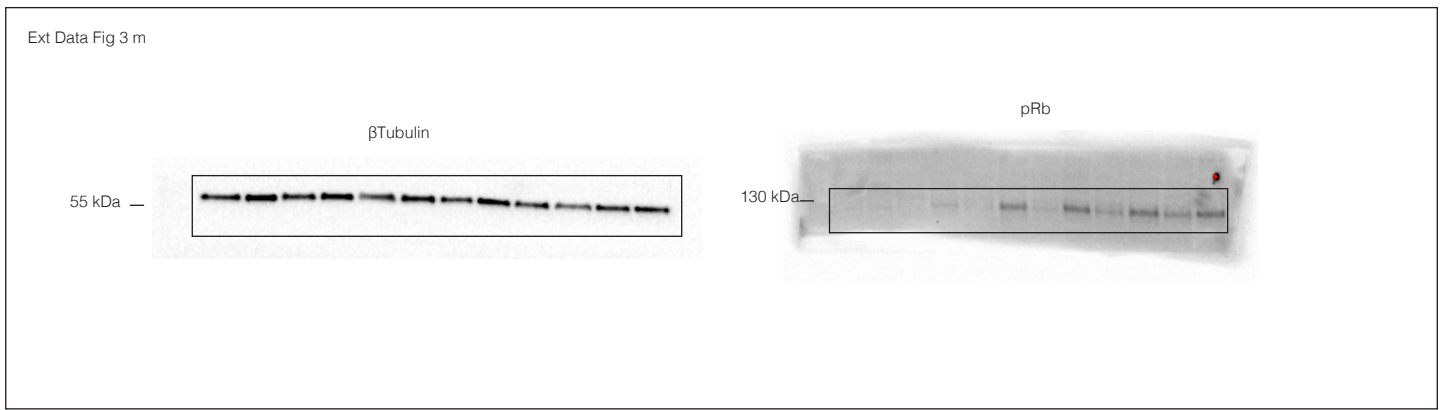

ED Fig. 4

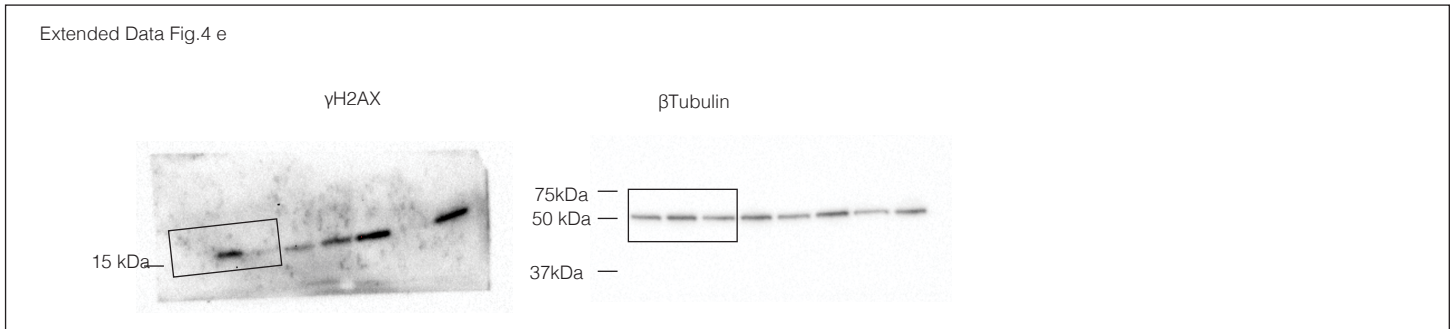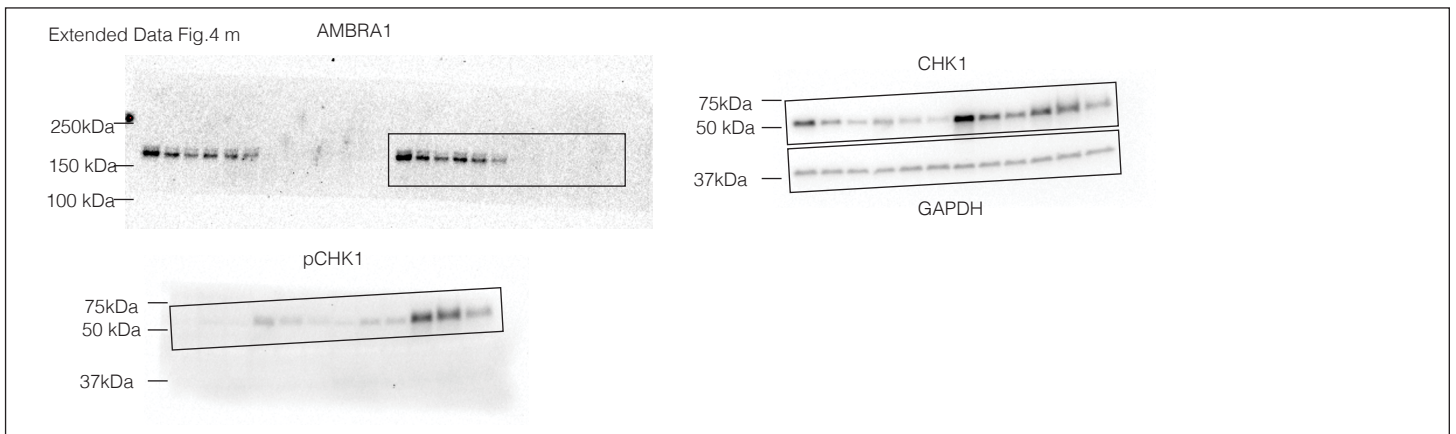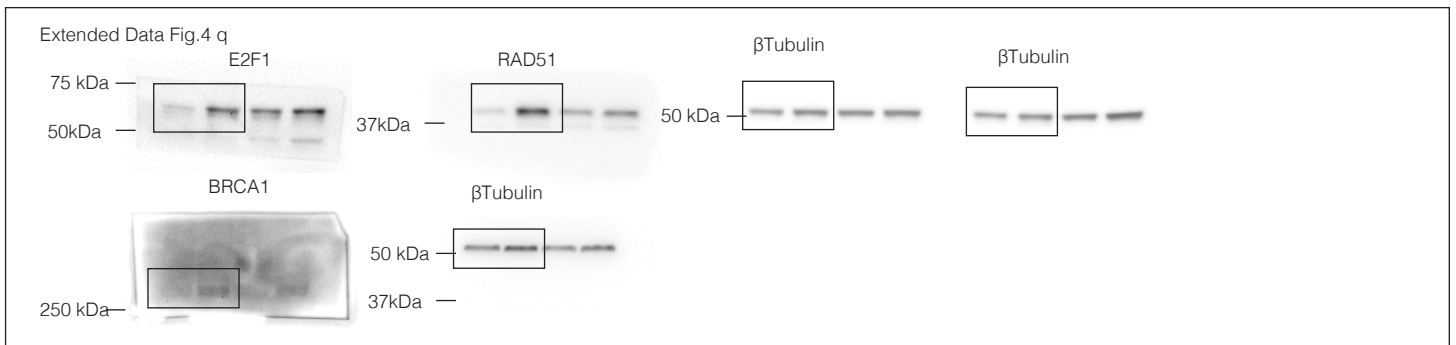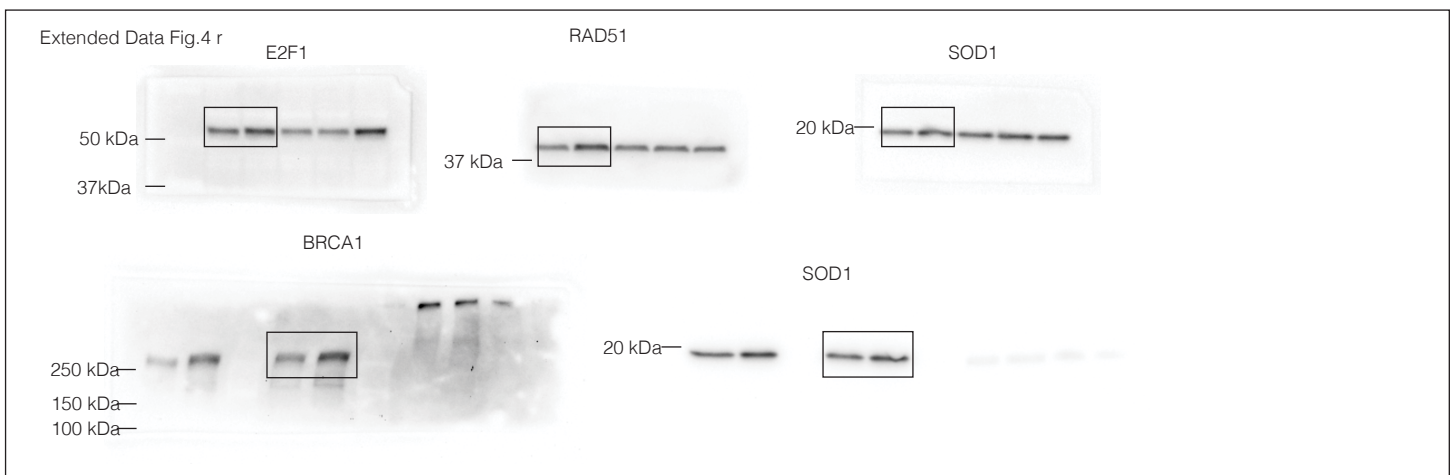

# ED Fig. 5

Extended data fig 5 c

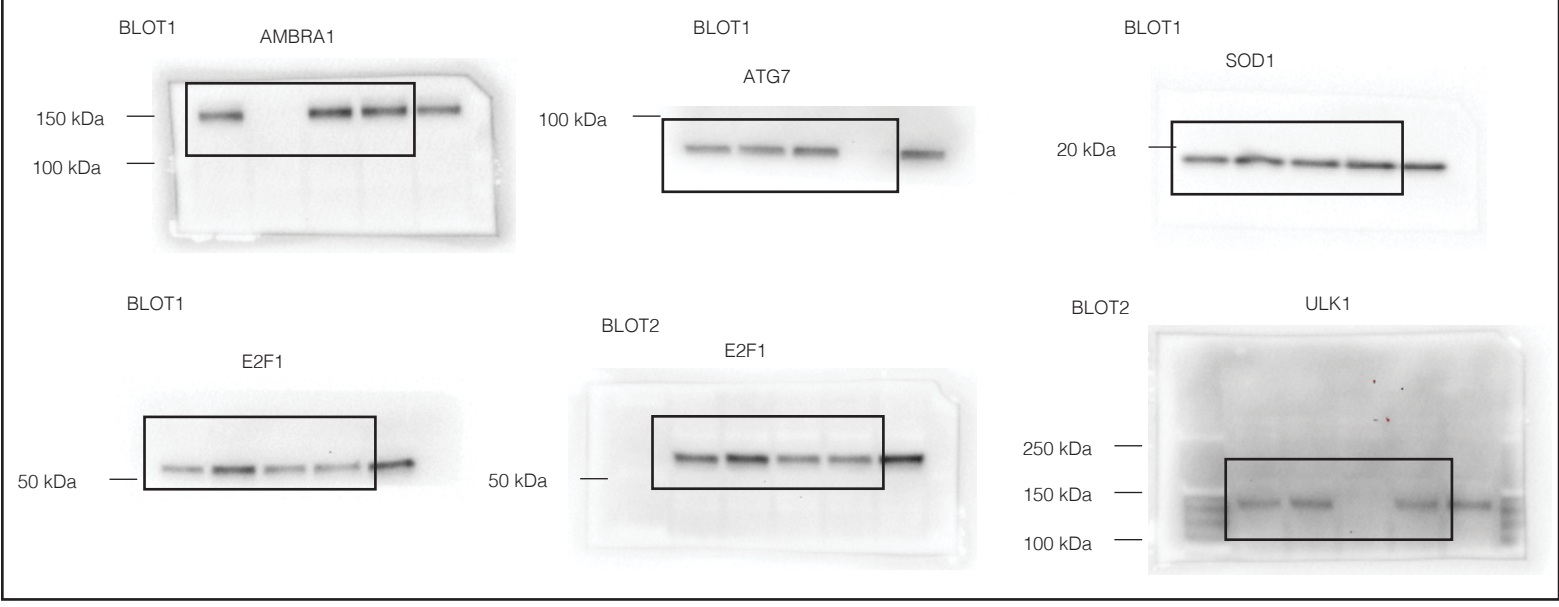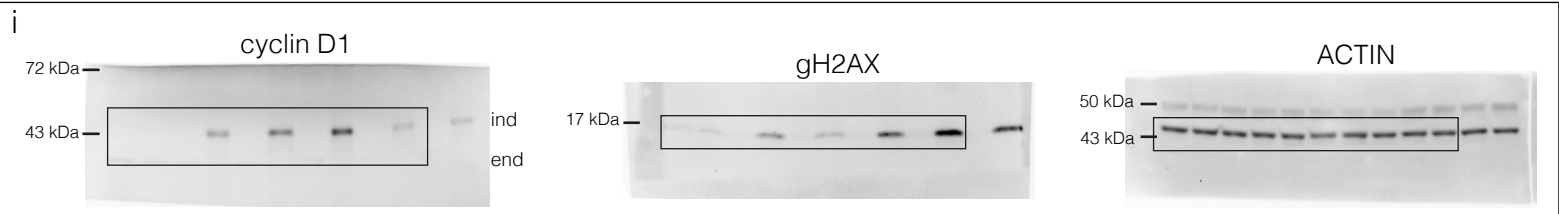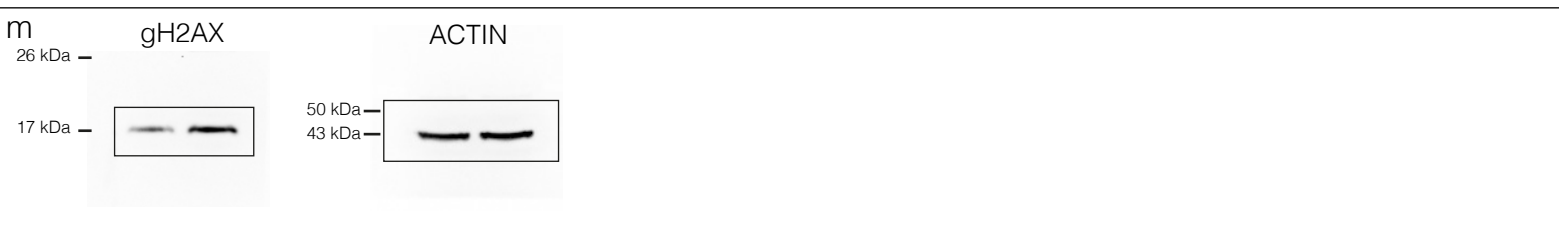

# ED Fig. 7

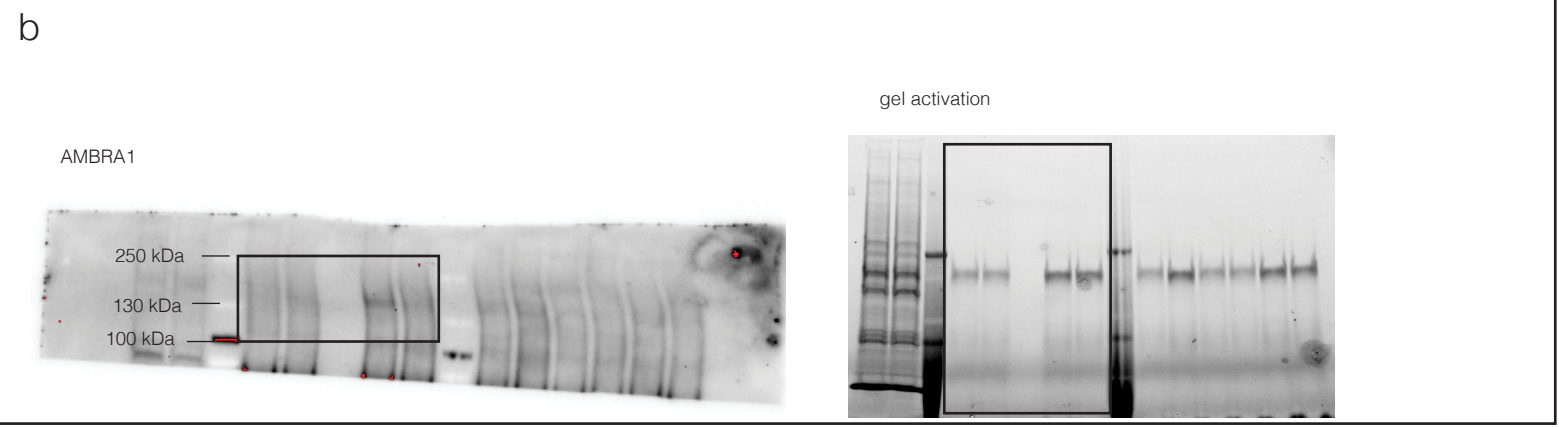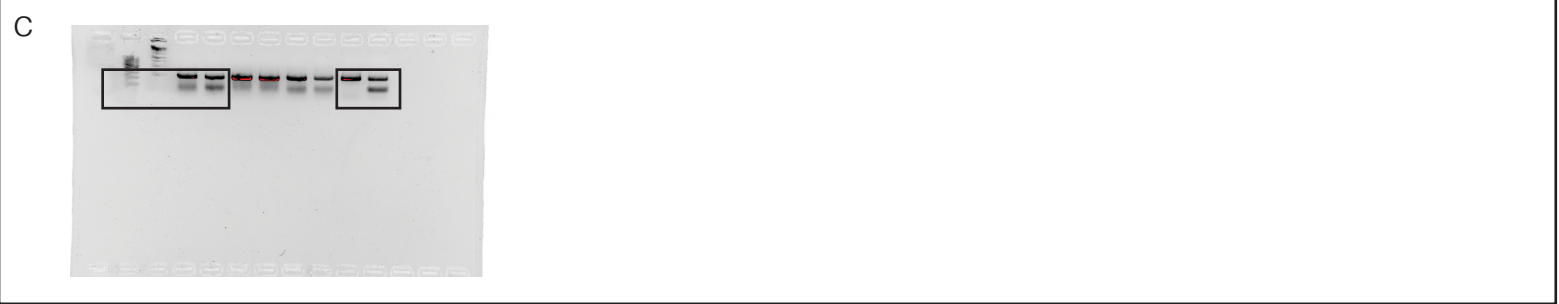

ED Fig. 8

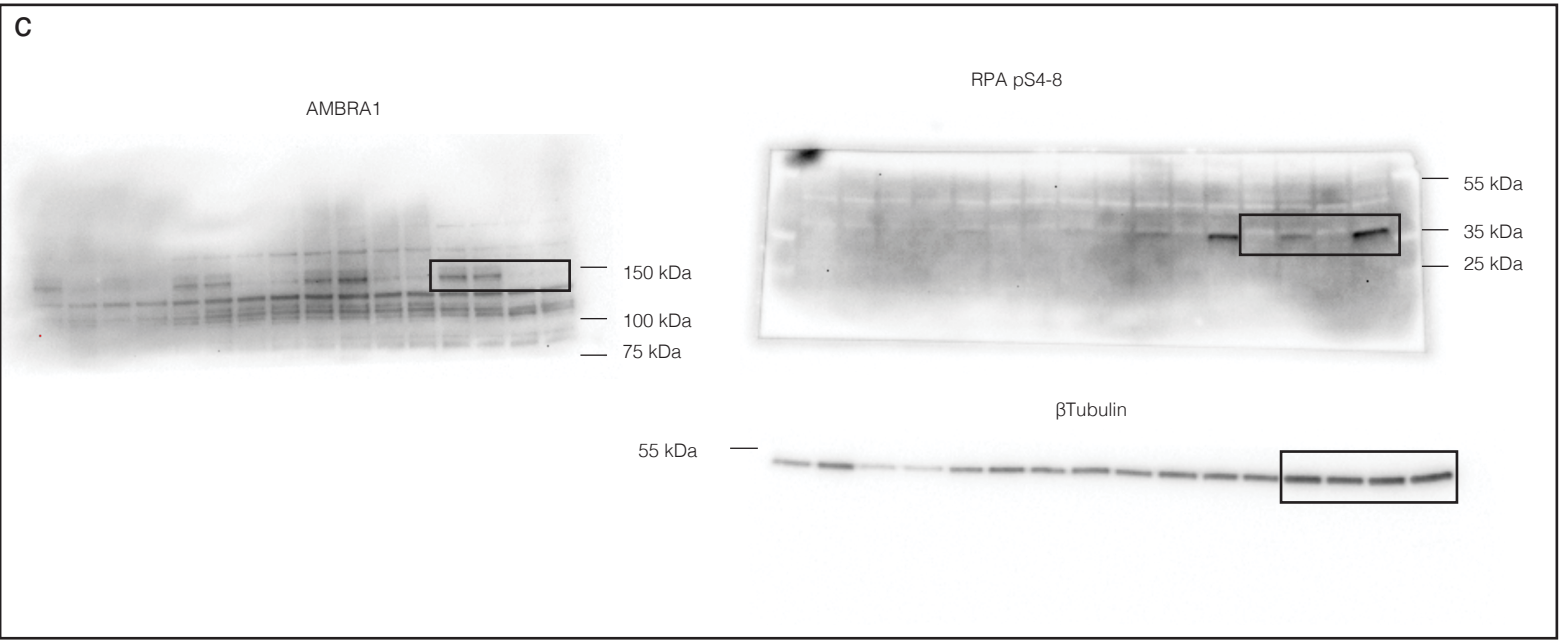



ED Fig. 8

j

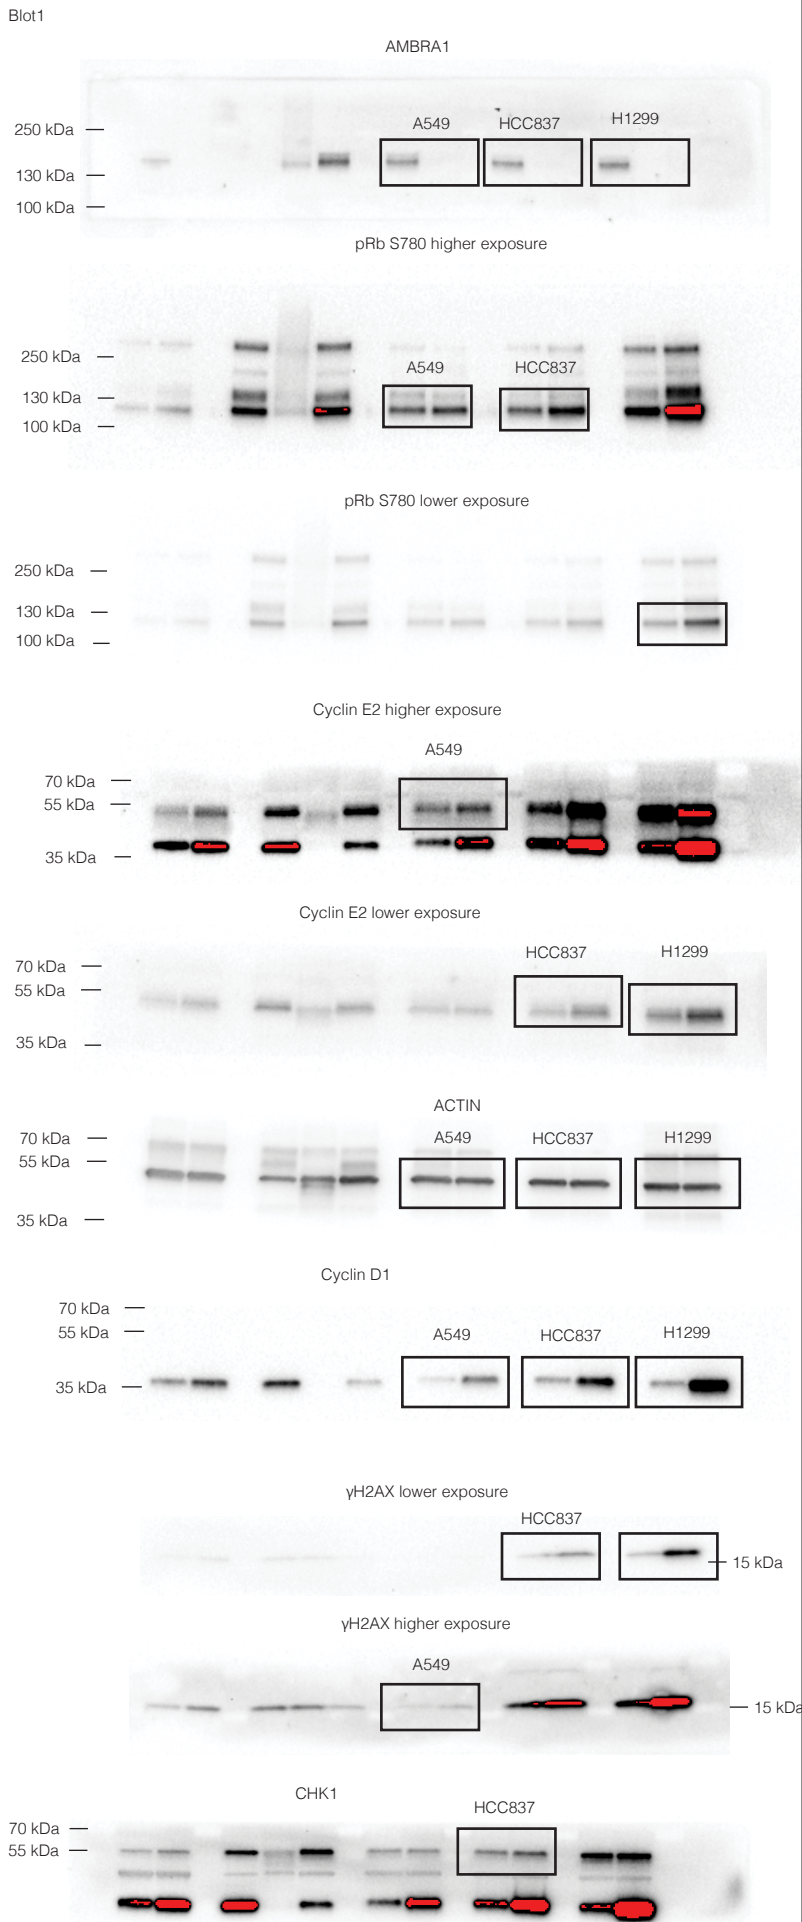

Blot2

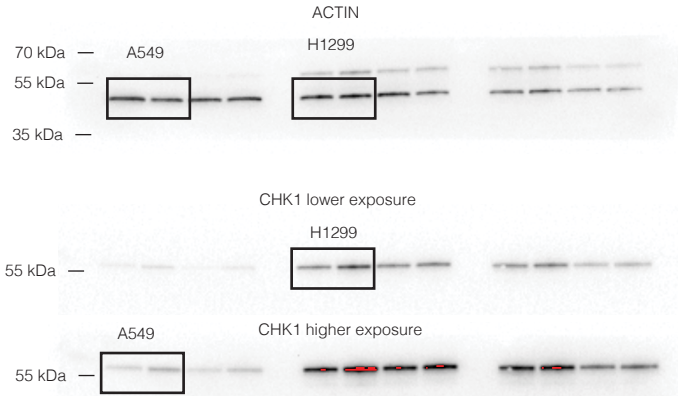

**k**

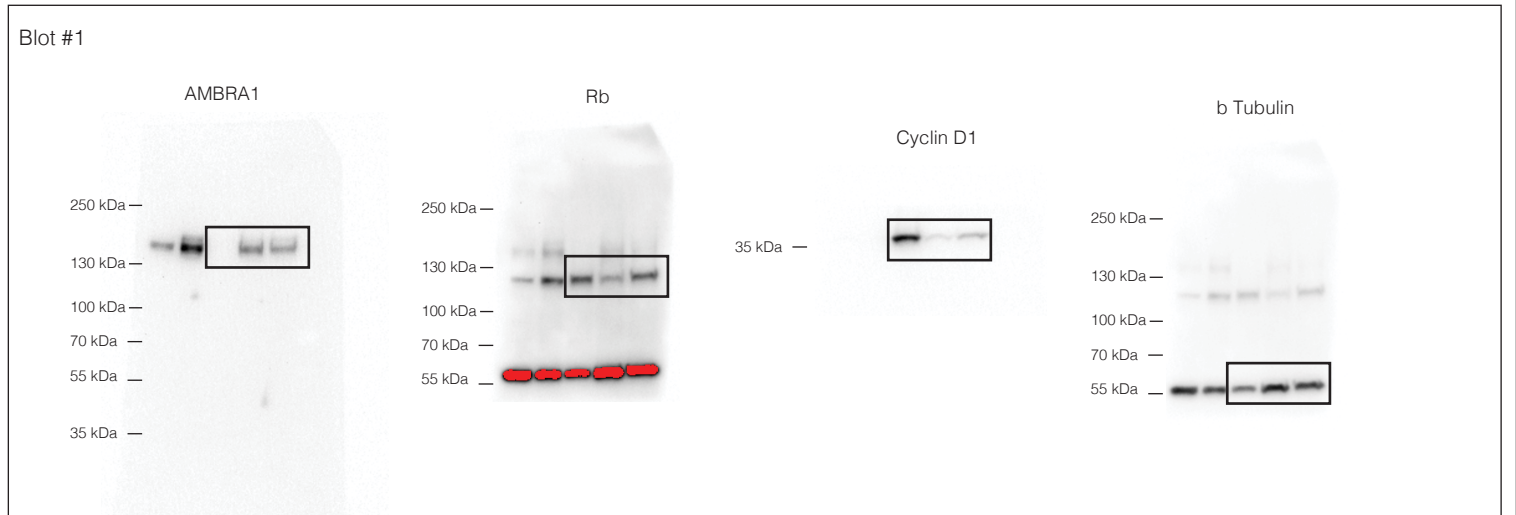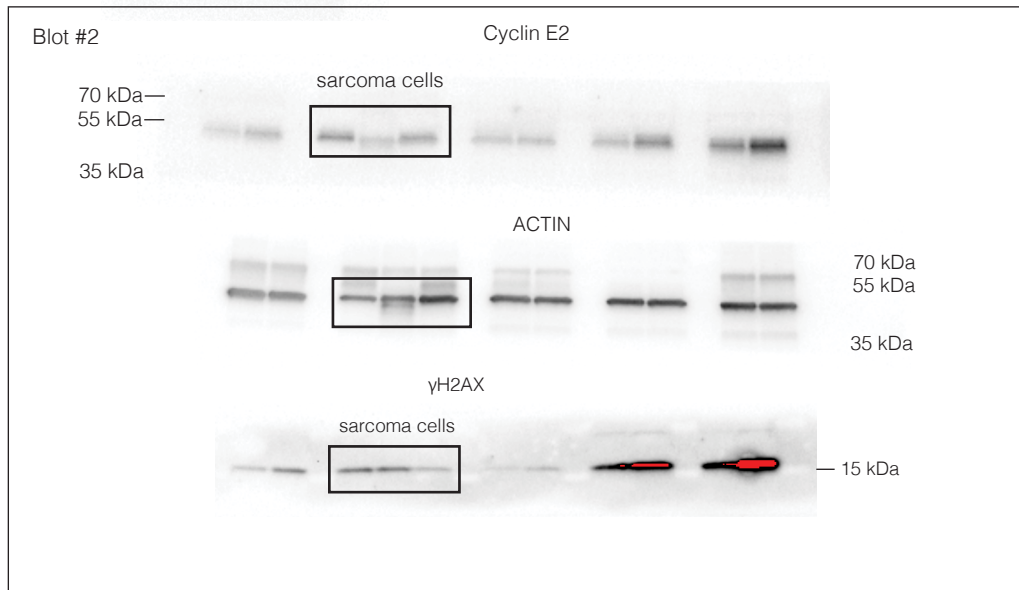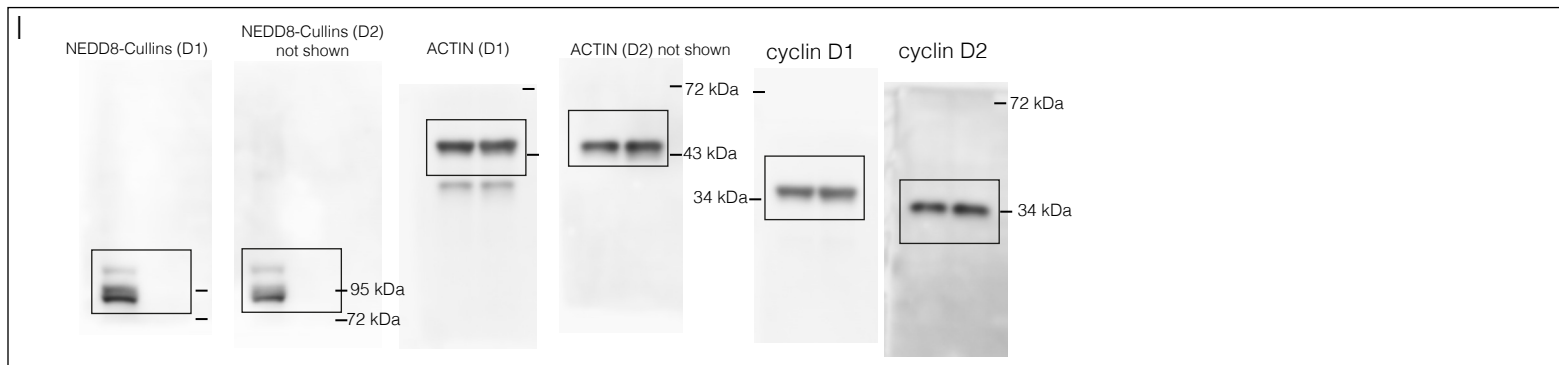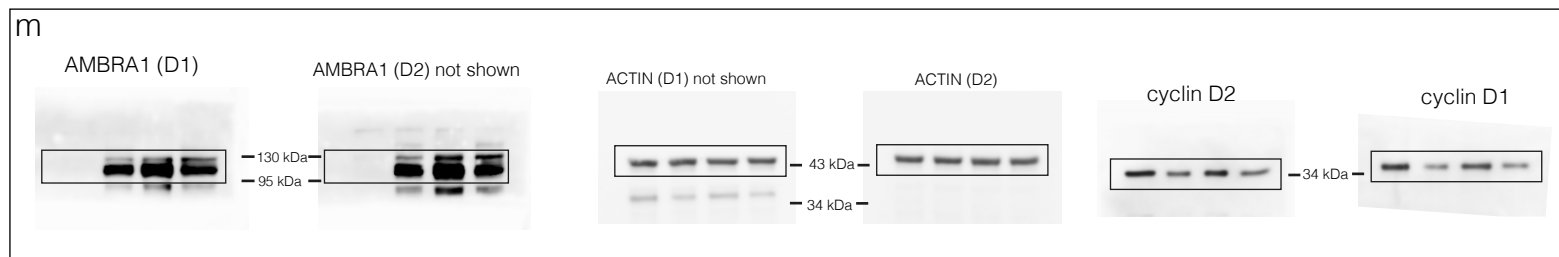

Supplementary Information 1 contains original uncropped gel pictures used to make the figures
