# Supplementary material
Source: PubMed Central journal article supplement (PMC8864551)
Supplement: NIHMS1776644-supplement-Sup_Fig__2.pdf [file NIHMS1776644-supplement-Sup_Fig__2.pdf]

Fig. 1d

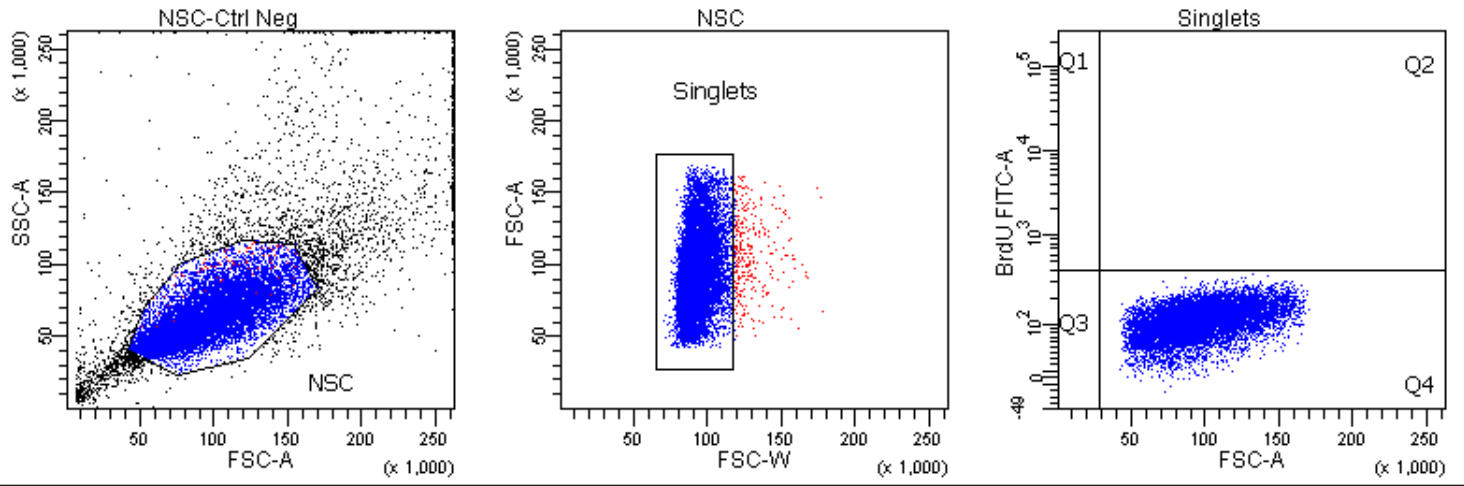

Extended Data Fig. 2c

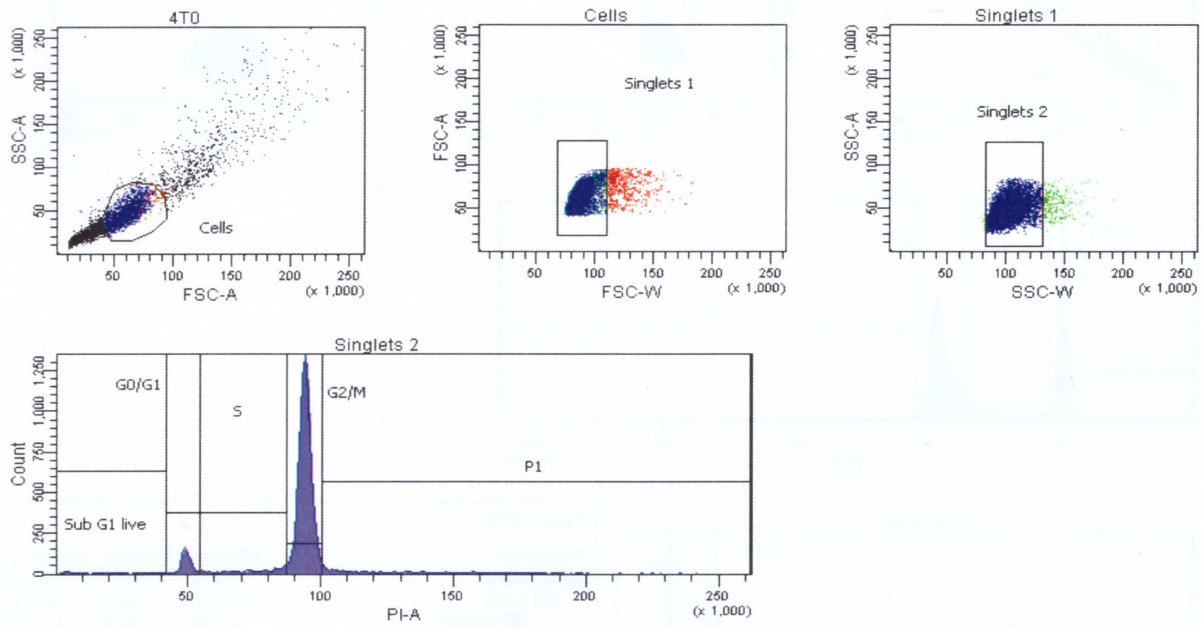

Extended Data Fig. 2d

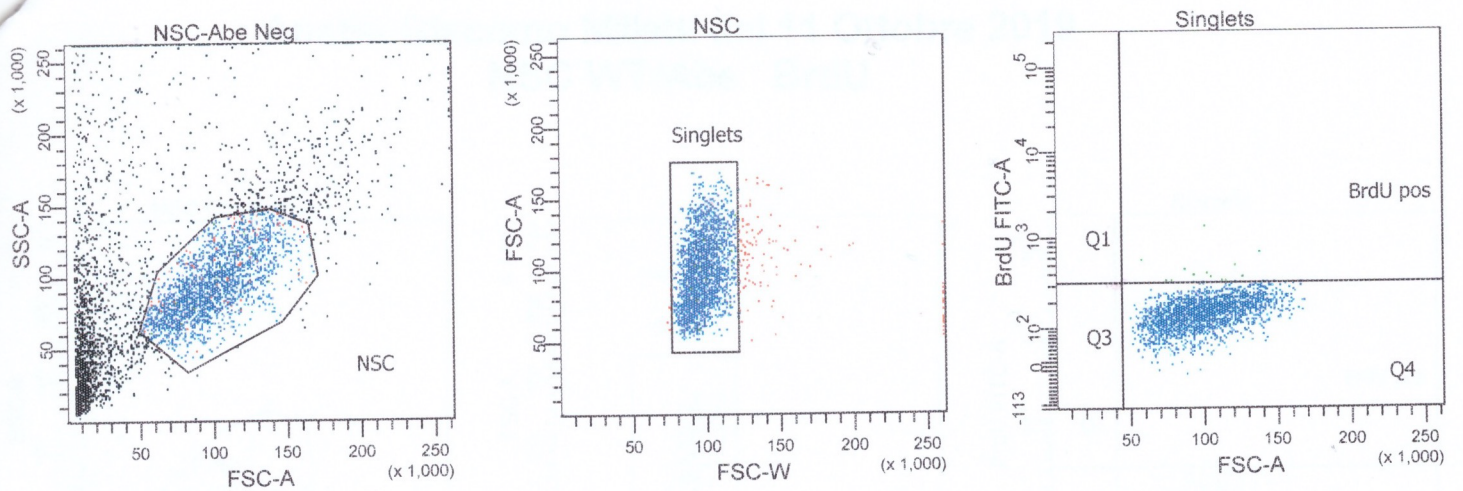

Extended Data Fig. 3l and 5b

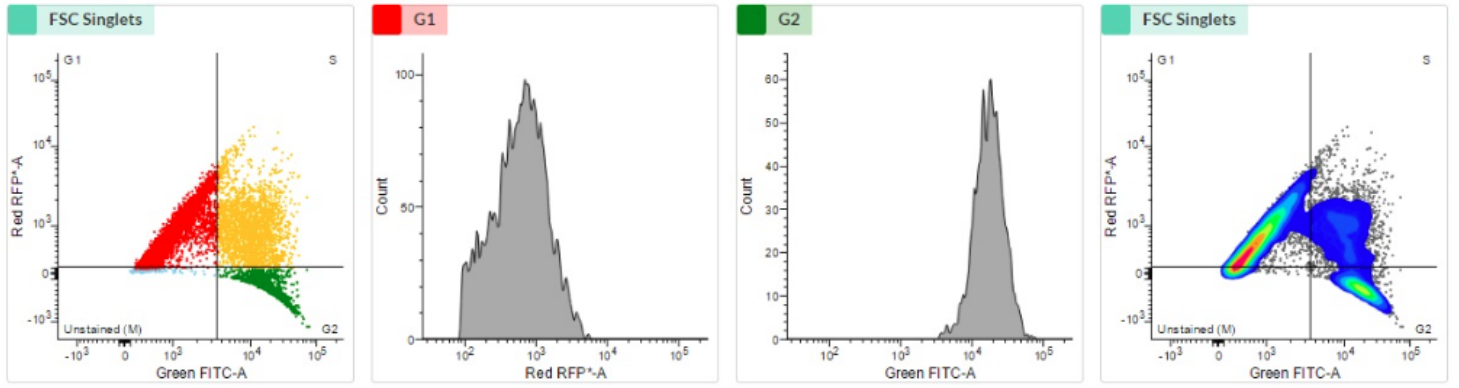

Extended Data Fig. 3f

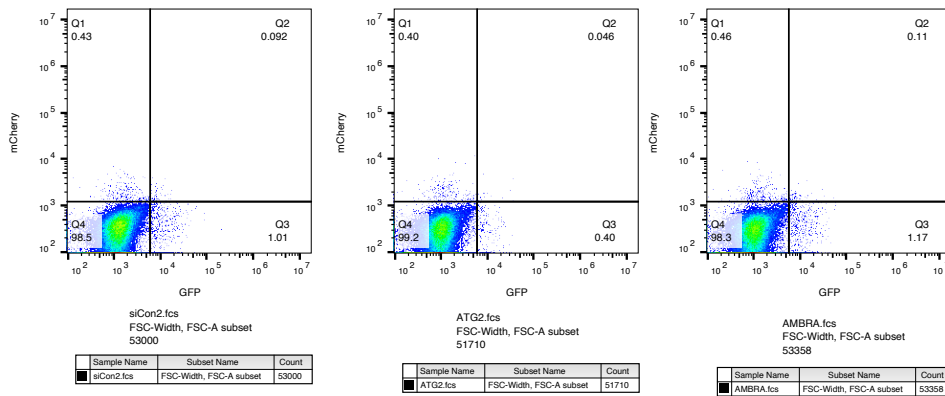

Extended Data Fig. 5g

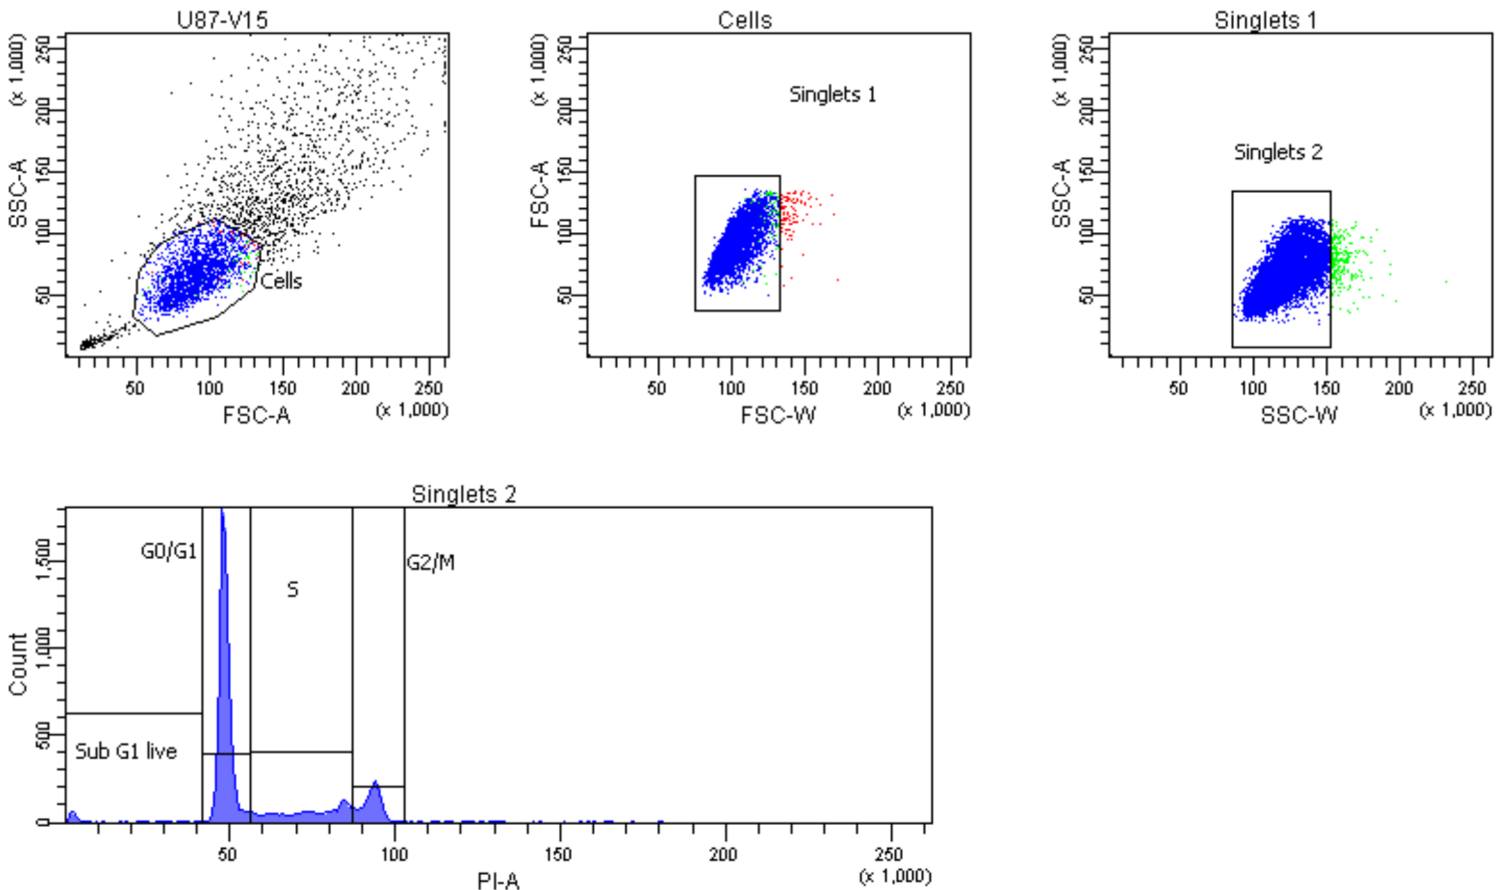

Extended Data Fig. 5h

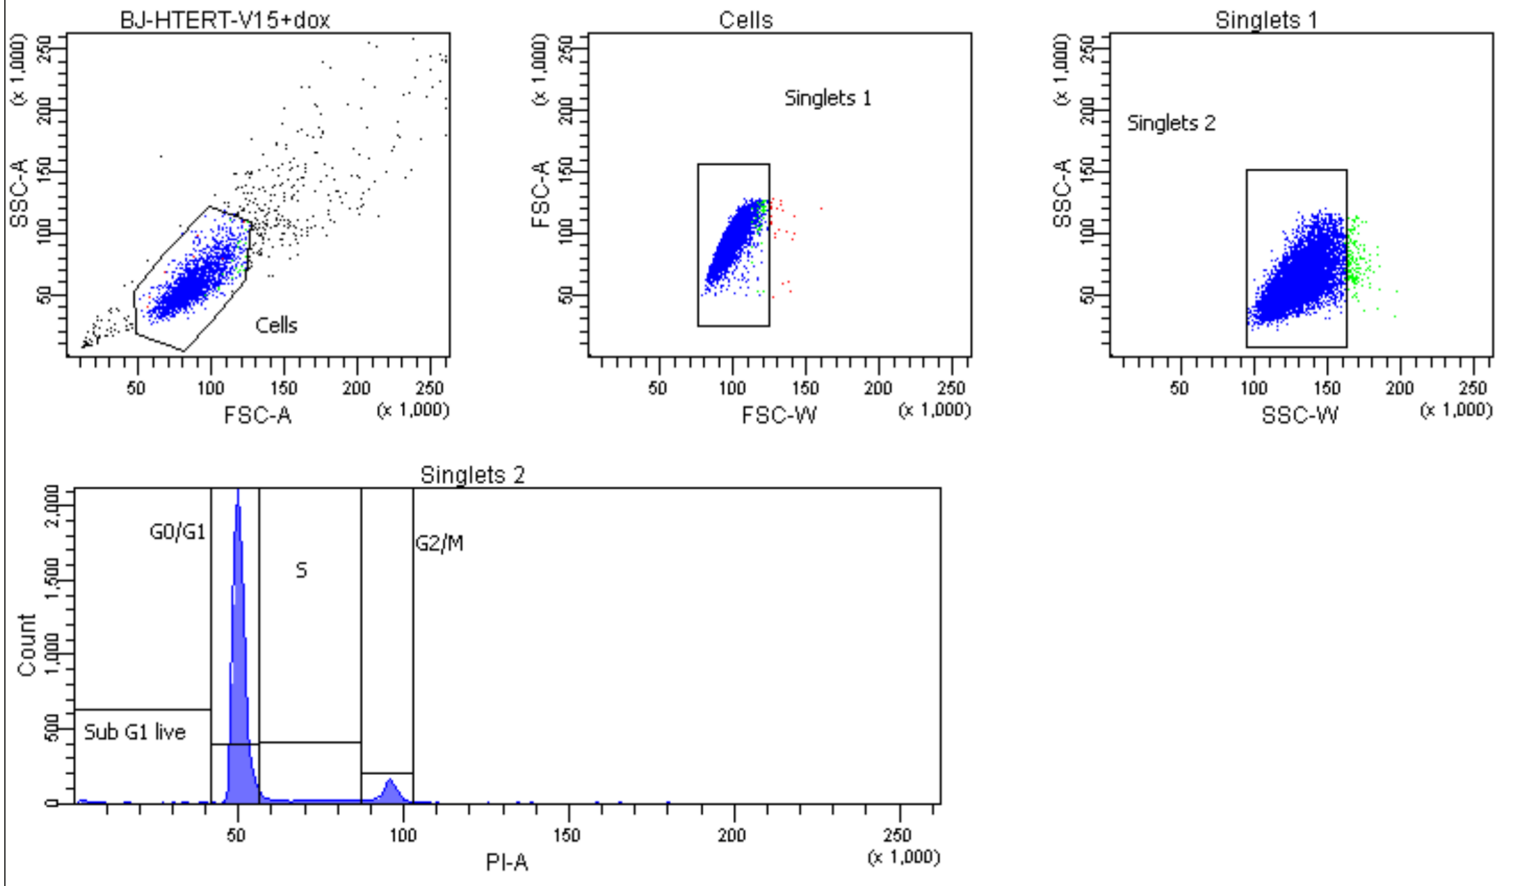

Extended Data Fig. 8n

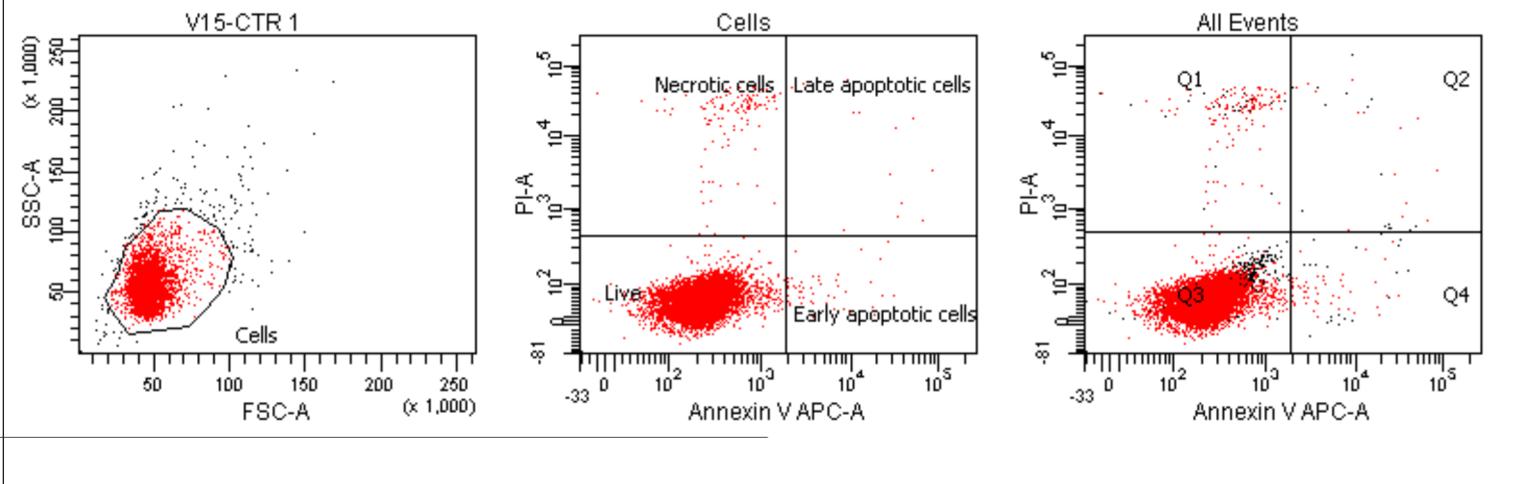

**Supplementary Information 2**, Figure exemplifying the gating strategy.

Representative gating strategy of experiment shown in **Fig. 1d**, **Extended Data Fig. 2c**, **2d**, **3l**, **3f**, **5b**, **5g**, **5h**, **8n**.
